# Supplementary material for: Reconstitution of a functional IS608 single-strand transpososome: role of non-canonical base pairing
Source: PubMed Central journal article supplement — Nucleic Acids Res. 2011 Jul 9;39(19):8503–12. doi: 10.1093/nar/gkr566 (PMC3201880; doi:10.1093/nar/gkr566), 2011-07-09
Supplement: supp_gkr566_supplementary_data.pdf [file supp_gkr566_supplementary_data.pdf]

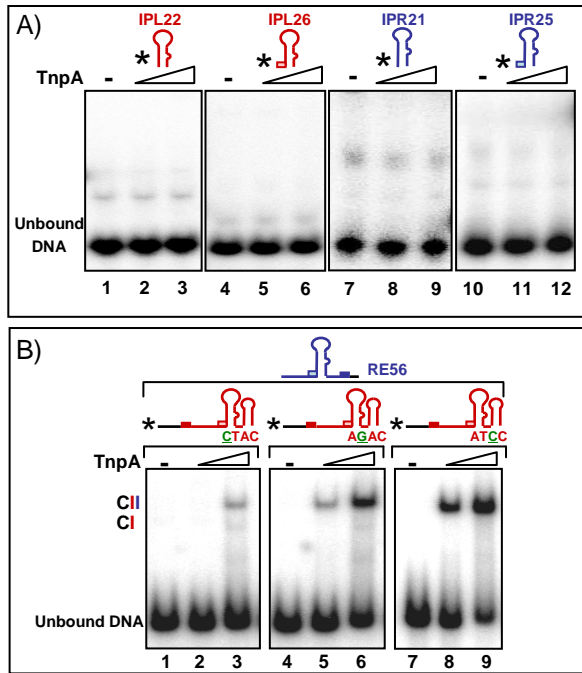

Figure S1

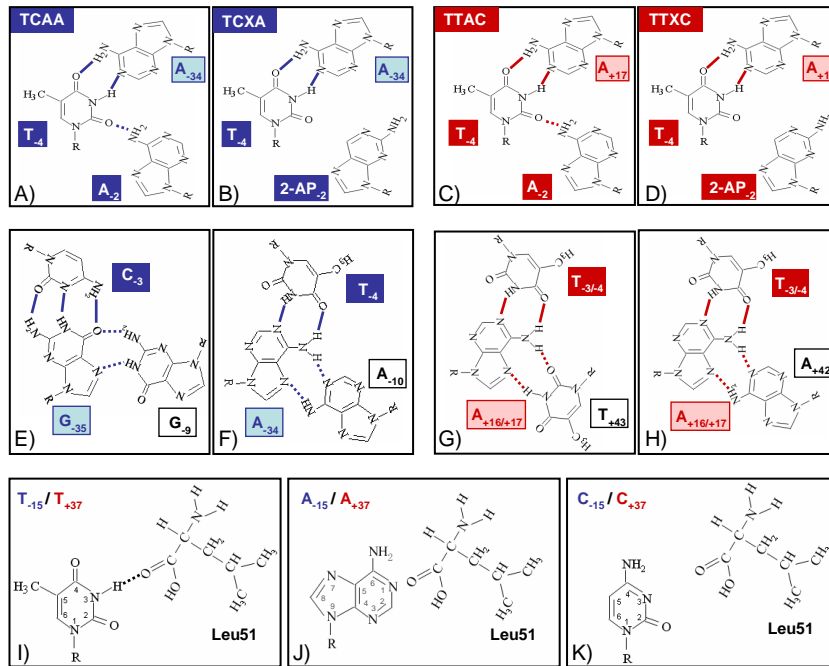

Figure S2

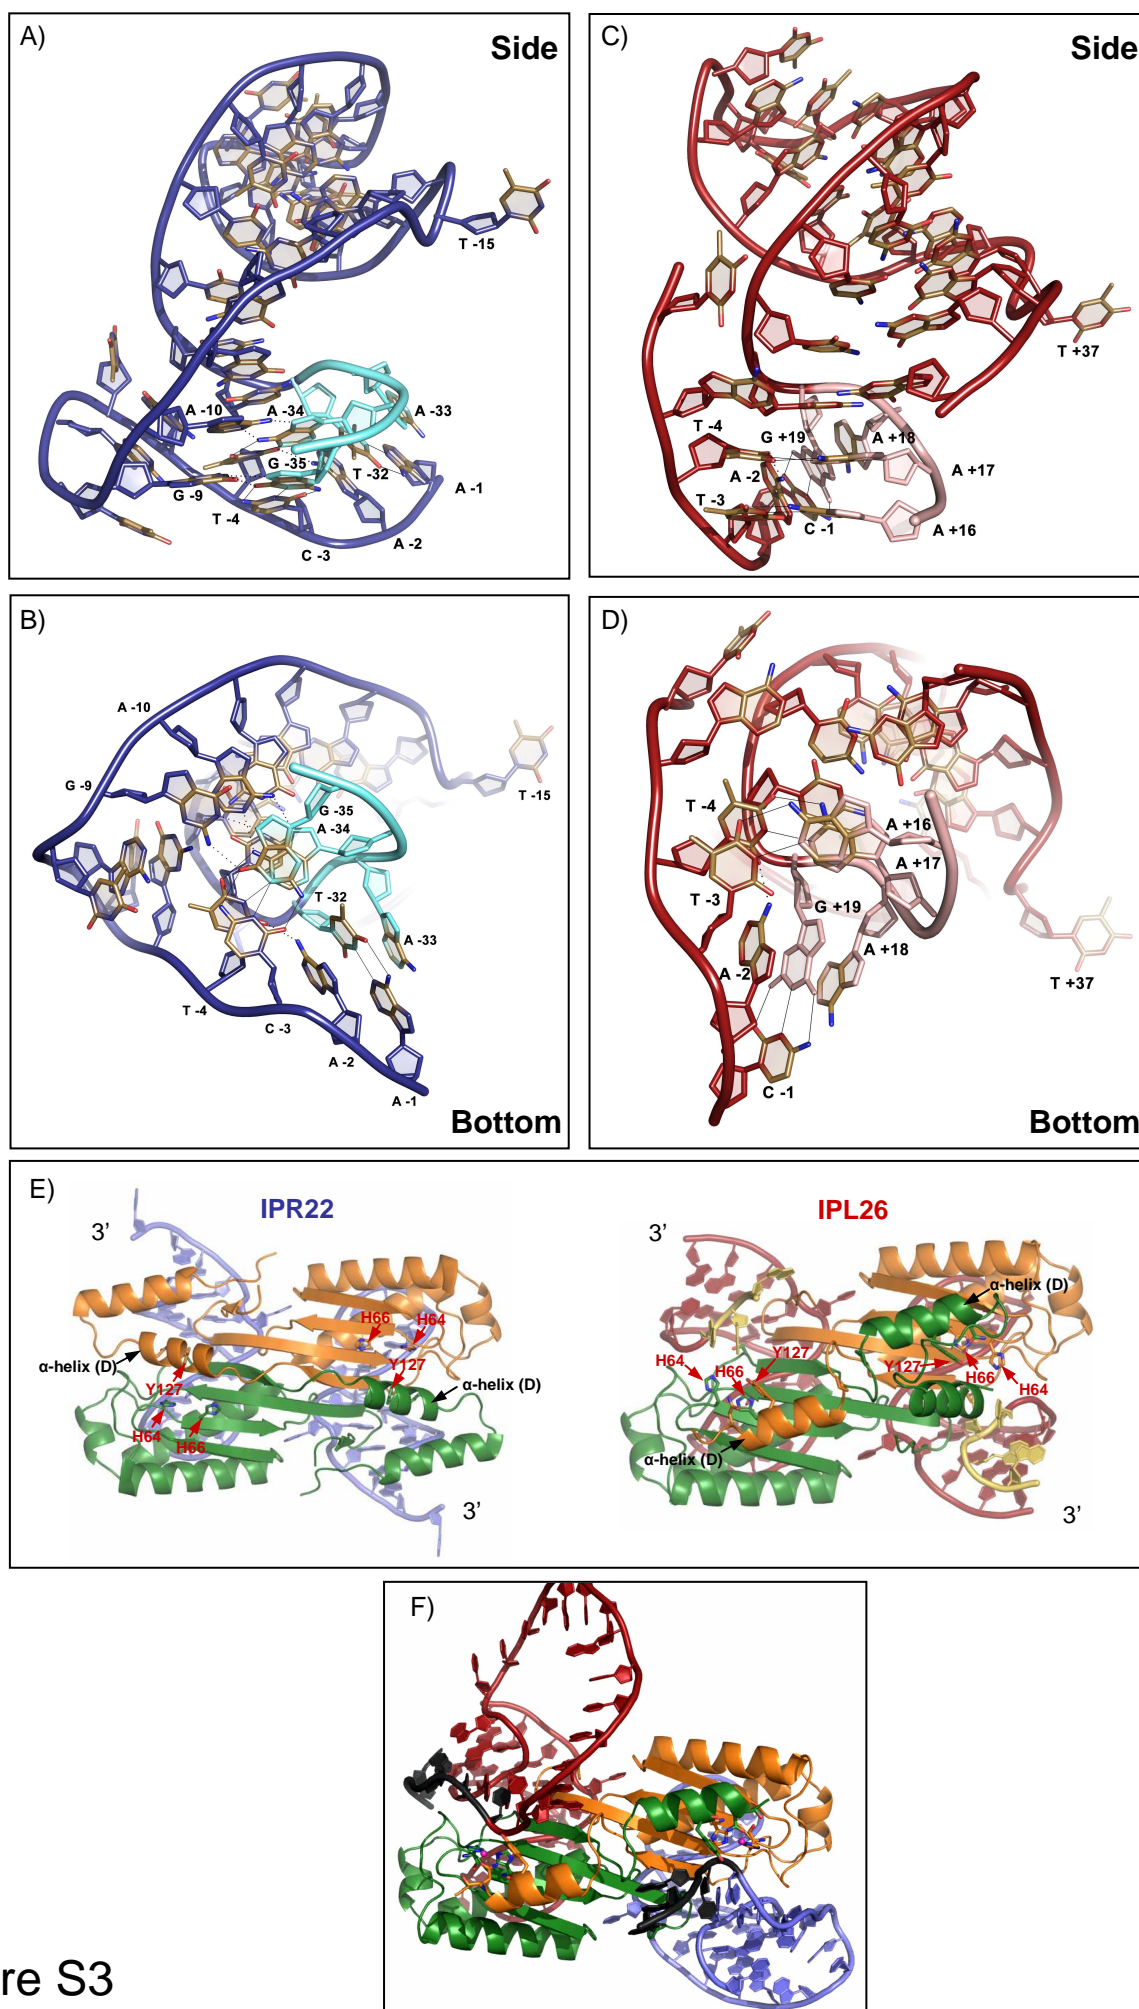

Figure S3

**Table S1**

| Name      | Sequence                                                                                                              |
|-----------|-----------------------------------------------------------------------------------------------------------------------|
| <b>LE</b> |                                                                                                                       |
| LE80      | CGCTAGTGCAAAAA <b>TTAC</b> CAAACTAACGCCTT <b>AAAG</b> CCCCTAGCTTTTAGCTATGGGGATACAAGGCGAAACGCCTTTA                     |
| LE100     | CGGGCTGCAGGAATTCGATTTGCGCTAGTGCAAAAA <b>TTAC</b> CAAACTAACGCCTT <b>AAAG</b> CCCCTAGCTTTTAGCTATGGGGATACAAGGCGAAACGCCTT |
| LE63      | CGCTAGTGCAAAAA <b>TTAC</b> CAAACTAACGCCTT <b>AAAG</b> CCCCTAGCTTTTAGCTATGGGGATAC                                      |
| LE59      | CGCTAGTGCAAAAA <b>TTAC</b> CAAACTAACGCCTT <b>AAAG</b> CCCCTAGCTTTTAGCTATGGGG                                          |
| LE64      | <b>TTAC</b> CAAACTAACGCCTT <b>AAAG</b> CCCCTAGCTTTTAGCTATGGGGATACAAGGCGAAACGCCTT                                      |
| LE60      | CAAACTAACGCCTT <b>AAAG</b> CCCCTAGCTTTTAGCTATGGGGATACAAGGCGAAACGCCTT                                                  |
| LE45      | <b>AAAG</b> CCCCTAGCTTTTAGCTATGGGGATACAAGGCGAAACGCCTT                                                                 |
| LE41      | CCCCTAGCTTTTAGCTATGGGGATACAAGGCGAAACGCCTT                                                                             |
| LE80_Gm   | CGCTAGTGCAAAAA <b>TTAC</b> CAAACTAACGCCTT <b>GGA</b> CCCCTAGCTTTTAGCTATGGGGATACAAGGCGAAACGCCTTTA                      |
| CTAC      | CGCTAGTGCAAAAA <b>TTAC</b> CAAACTAACGCCTT <b>AAAG</b> CCCCTAGCTTTTAGCTATGGGG <b>CTAC</b> AAGGCGAAACGCCTTTA            |
| AGAC      | CGCTAGTGCAAAAA <b>TTAC</b> CAAACTAACGCCTT <b>AAAG</b> CCCCTAGCTTTTAGCTATGGGG <b>AGAC</b> AAGGCGAAACGCCTTTA            |
| CGAC      | CGCTAGTGCAAAAA <b>TTAC</b> CAAACTAACGCCTT <b>AAAG</b> CCCCTAGCTTTTAGCTATGGGG <b>CGAC</b> AAGGCGAAACGCCTTTA            |
| ATCC      | CGCTAGTGCAAAAA <b>TTAC</b> CAAACTAACGCCTT <b>AAAG</b> CCCCTAGCTTTTAGCTATGGGG <b>ATCC</b> AAGGCGAAACGCCTTTA            |
| IPL22     | CCCCTAGCTTTTAGCTATGGGG                                                                                                |
| IPL26     | <b>AAAG</b> CCCCTAGCTTTTAGCTATGGGG                                                                                    |
| TTXC      | CGCTAGTGCAAAAA <b>TTX</b> CAAACTAACGCCTT <b>AAAG</b> CCCCTAGCTTTTAGCTATGGGGATACAAGGCGAAACGCCTTTA                      |
| <b>RE</b> |                                                                                                                       |
| RE45      | <b>GAAT</b> CCCCTAGCTTTAGCTATGGGGAGTATGT <b>TCAA</b> CAAATTTGCC                                                       |
| RE49      | GCTTTAGCTA <b>GAAT</b> CCCCTAGCTTTAGCTATGGGGAGTATGT <b>TCAA</b> ATTCG                                                 |
| RE56      | CTCATGCTTTAGCTA <b>GAAT</b> CCCCTAGCTTTAGCTATGGGGAGTATGT <b>TCAA</b> CAAATT                                           |
| RE70      | TTCCTCATGCTTTAGCTA <b>GAAT</b> CCCCTAGCTTTAGCTATGGGGAGTATGT <b>TCAA</b> CAAATTTGCCTAATGAC                             |
| RE45_pc   | GCTTTAGCTA <b>GAAT</b> CCCCTAGCTTTAGCTATGGGGAGTATGT <b>TCAA</b>                                                       |
| RE45_Cm   | <b>GAAT</b> CCCCTAGCTTTAGCTATGGGGAGTATGT <b>AGAG</b> CAAATTTGCC                                                       |
| RE45_Cd   | TCATGCTTTAGCTA <b>GAAT</b> CCCCTAGCTTTAGCTATGGGGAGTATG                                                                |
| RE_Gd     | CCCCTAGCTTTAGCTATGGGGAGTATGT <b>TCAA</b> CAAATTTGCCTAATGAC                                                            |
| RE56_Tm   | CTCATGCTTTAGCTA <b>GAAT</b> CCCCTAGCTTTAGCTATGGGG <b>CTT</b> ATGT <b>TCAA</b> CAAATT                                  |
| RE56_T->A | CTCATGCTTTAGCTA <b>GAAT</b> CCCCTAGCTTTAGCTA <b>AGGGG</b> AGTATGT <b>TCAA</b> CAAATT                                  |
| RE56_T->C | CTCATGCTTTAGCTA <b>GAAT</b> CCCCTAGCTTTAGCTA <b>CGGGG</b> AGTATGT <b>TCAA</b> CAAATT                                  |

|               |                                                                                    |
|---------------|------------------------------------------------------------------------------------|
| RE56_ΔT       | CTCATGCTTTAGCTA <b>GAAT</b> CCCCTAGCTTTAGCTAGGGGAGTATGT <b>CAACAAATT</b>           |
| IPR21         | CCCCTAGCTTTAGCTATGGGG                                                              |
| IPR22         | CCCCTAGCTTTAGCTATGGGGA                                                             |
| IPR25         | <b>GAAT</b> CCCCTAGCTTTAGCTAGGGG                                                   |
| TCXA          | <b>GAAT</b> CCCCTAGCTTTAGCTATGGGGAGTATGT <b>TCX</b> ACAAATTTGCC                    |
| RE49 <b>F</b> | GCTTTAGCTA <b>GAAT</b> CCCCTAGCTTTAGCTATGGGGAGTATGT <b>CAATT</b> CG- <b>F</b>      |
| Tip T_m       | CTCATGCTTTAGCTA <b>GAAT</b> CCCCTAGCT <b>AA</b> AGCTATGGGGAGTATGT <b>CAACAAATT</b> |
| HP_m          | CTCATGCTTTAGCTA <b>GAATGGGCATGGATTCCATTGCC</b> AGTATGT <b>CAACAAATT</b>            |

$C_L$  and  $G_L$  present in red and pink, while  $C_R$  and  $G_R$  present in blue and pale blue. Mutations are shown in green. **X** = 2-aminopurine. **F** = fluorescein.

### **Figure S1. Supplementary gel data.**

**A) IP binding to TnpA cannot be detected by EMSA.** EMSA of 5' labelled 22 nt (lanes 1-3) or 25 nt (lanes 4-6) IP<sub>L</sub>, and 21 nt (lanes 7-9) or 24 nt (lanes 10-12) IP<sub>R</sub> performed with 0 μM, 0.5 μM and 2.5 μM TnpA-His6.

**B) Effect of single base mutation in the ATAC tetranucleotide 3' to IP<sub>L</sub> on synaptic complex robustness.** EMSA of 5' labelled LE mutations and unlabeled RE56 with 0 μM, 0.5 μM and 2.5 μM TnpA-His6. ATAC mutated to CTAC (lanes 1-3), AGAC (lanes 4-6), or ATCC (lanes 7-9).

### **Figure S2. Details of non-canonical base pairing in LE and RE.**

Non-canonical base pairing between T<sub>-4</sub> and A<sub>-2</sub> within C<sub>R</sub> (A), C<sub>L</sub> (C) and between A<sub>-10</sub>G<sub>-9</sub> and G<sub>-35</sub> A<sub>-34</sub> (E and F) are shown as dotted lines (blue for RE and red for LE). Replacement of A<sub>-2</sub> by 2-AP<sub>-2</sub> eliminates non-canonical base pairing (B and D). Proposed non-canonical base pairing between A<sub>+16</sub>A<sub>+17</sub> and A<sub>+42</sub>A<sub>+44</sub> is shown in G and H. Interaction between the extrahelical T of IP<sub>R</sub> (T<sub>-15</sub>) or IP<sub>L</sub> (T<sub>+37</sub>) and Leu51 (I). This hydrogen bond is destroyed by replacing T by A (J) or C (K).

### **Figure S3. An overview of canonical and non-canonical base pairing network in LE and RE ends.**

**A) Side view of the RE IP structure within the TnpA transpososome. B) Bottom view of RE. C) Side view of the LE IP structure within the TnpA transpososome. D) Bottom view of LE.** Figures were drawn with pymol v1.3, [www.pymol.org](http://www.pymol.org), Schrodinger Inc. Non-canonical base pairings are shown by dotted lines. The guide sequences are shown in pale blue (RE) or pink (LE). The nucleotide coordinates are those from (Barabas et al., 2008) shown in Fig. 5.

**E) Overall view of the crystal structure of TnpA-IPR22 (left panel) and TnpA-IPL26 (right panel).** One transposase monomer is shown in green and the other in orange. LE and RE are indicated in red and blue respectively and are bound on the inferior face of the TnpA dimer. α-helix D and the active site residues H64, H66 and Y127 are indicated.

**F) Simulated structure of transpososome carrying one LE and one RE.** It is not possible to generate biologically relevant transpososomes including one LE and one RE for crystallography. This figure is derived from individual resolved structures of transpososomes containing two RE copies or two LE copies. The flanking DNA from the donor molecule is shown in black.

**Table S1. Oligonucleotides used.**
